# Supplementary material for: Whole genome sequencing identifies genetic variants associated with neurogenic inflammation in rosacea
Source: PubMed Central journal article supplement (PMC10319783; doi:10.1038/s41467-023-39761-2), 2023-07-05
Supplement: 41467_2023_39761_MOESM3_ESM.pdf [file 41467_2023_39761_MOESM3_ESM.pdf]

## **Description of Additional Supplementary Files**

**Supplementary Data 1:** List of candidate variants identified for each large family by whole-genome sequencing.

**Supplementary Data 2:** List of candidate variants identified for each small family by whole-exome sequencing.

**Supplementary Data 3:** DEGs for mutant DGRs vs WT DRGs.

**Supplementary Data 4:** Detailed information of each subject in rosacea families.

**Supplementary Data 5:** qPCR primers.
