# Supplementary material for: Whole genome sequencing identifies genetic variants associated with neurogenic inflammation in rosacea
Source: Nat Commun. 2023 Jul 5;14:3958. doi: 10.1038/s41467-023-39761-2 (PMC10319783; doi:10.1038/s41467-023-39761-2)
Supplement: Supplementary file 1 — Supplementary Information [file 41467_2023_39761_MOESM1_ESM.pdf]

## Supplementary Information

Whole genome sequencing identifies genetic variants associated  
with neurogenic inflammation in rosacea

Zhili Deng<sup>1, 2, 3, #</sup>, Mengting Chen<sup>1, 2, 3, #</sup>, Zhixiang Zhao<sup>1, 2, 3</sup>, Wenqin Xiao<sup>1, 2, 3</sup>,  
Tangxiele Liu<sup>1, 2, 3</sup>, Qinqin Peng<sup>1, 2, 3</sup>, Zheng Wu<sup>1, 2, 3</sup>, San Xu<sup>1, 2, 3</sup>, Wei Shi<sup>1, 2, 3</sup>,  
Dan Jian<sup>1, 2, 3</sup>, Ben Wang<sup>1, 2, 3</sup>, Fangfen Liu<sup>1, 2, 3</sup>, Yan Tang<sup>1, 2, 3</sup>, Yingxue Huang<sup>1,  
2, 3</sup>, Yiya Zhang<sup>1, 2, 3</sup>, Qian Wang<sup>4</sup>, Lunquan Sun<sup>3, 5</sup>, Hongfu Xie<sup>1, 2, 3</sup>, Guohong  
Zhang<sup>6, \*</sup>, Ji Li<sup>1, 2, 3, \*</sup>

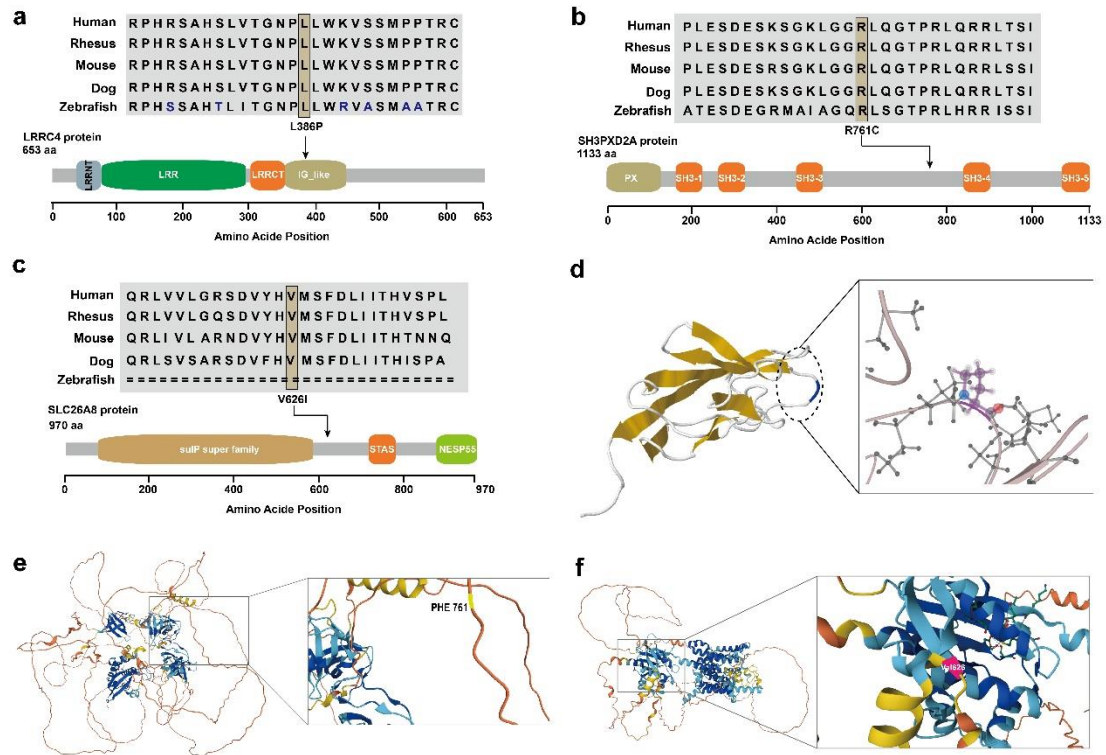

**Supplementary Figure 1. Genes with single rare deleterious variants are identified in large rosacea families. a-c** Multi-species alignment of conservation of variants in *LRRC4* (a), *SH3PXD2A* (b) and *SLC26A8* (c) genes. The conservation of the mutated amino acids is indicated by the alignment of five species. Evolutionarily conserved positions for nominated pathogenic variants are highlighted in yellow. **d-f** The positions of mutated amino acids in the protein structures of *LRRC4* (d), *SH3PXD2A* (e), and *SLC26A8* (f).

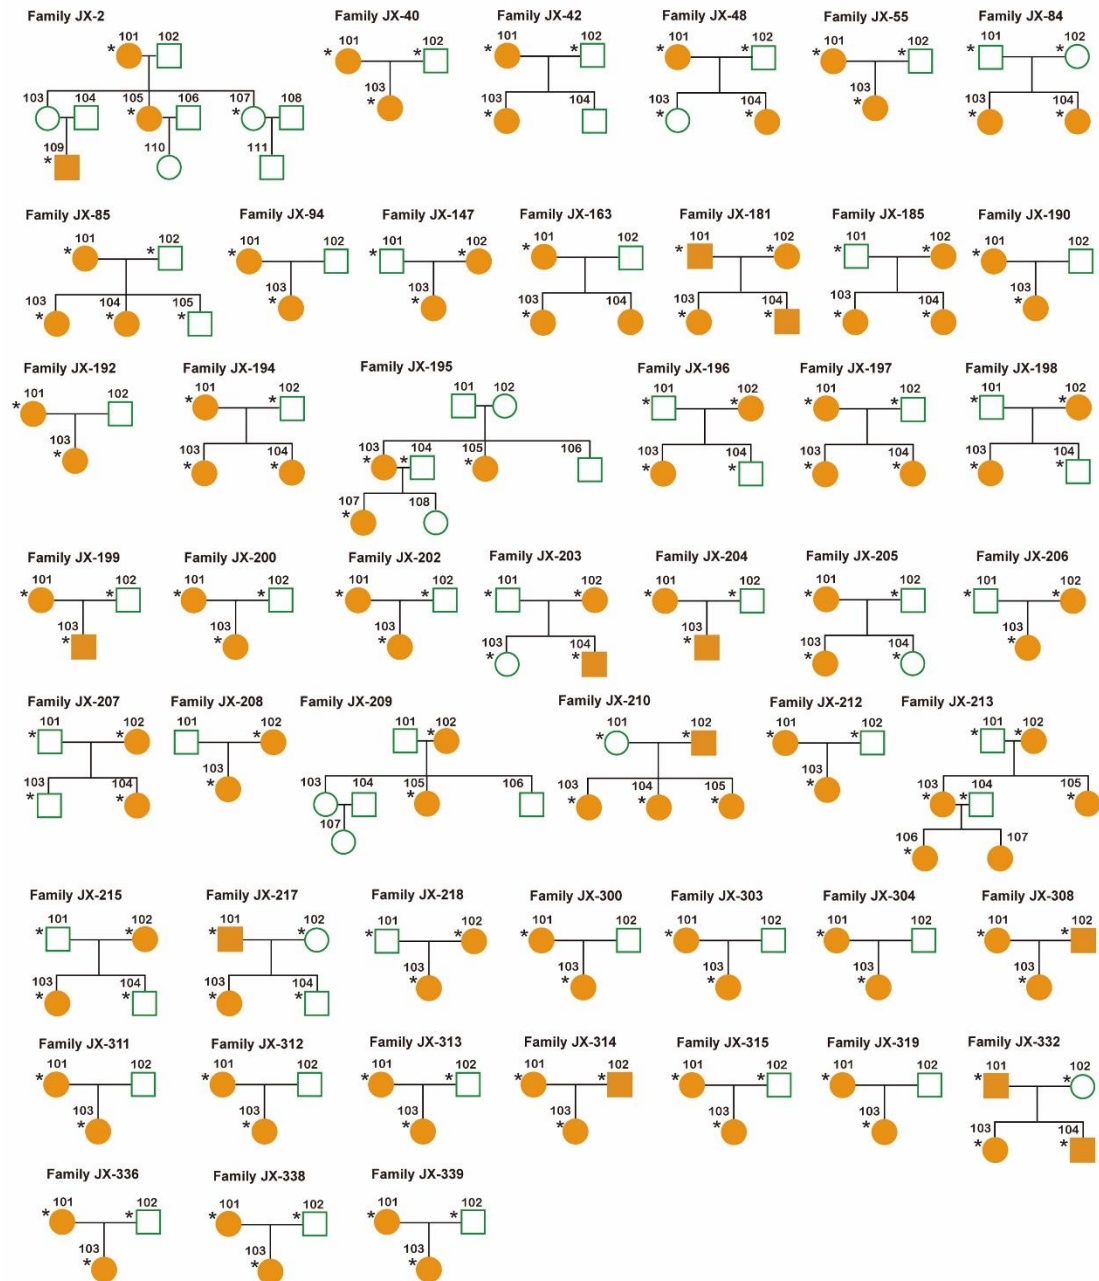

**Supplementary Figure 2. Pedigree structures of 49 small rosacea families.** Solid symbols indicate individuals affected with rosacea; open symbols denote unaffected relatives; squares indicate male individuals; circles denote female individuals. Individuals with whole exome sequencing are indicated by single asterisks.

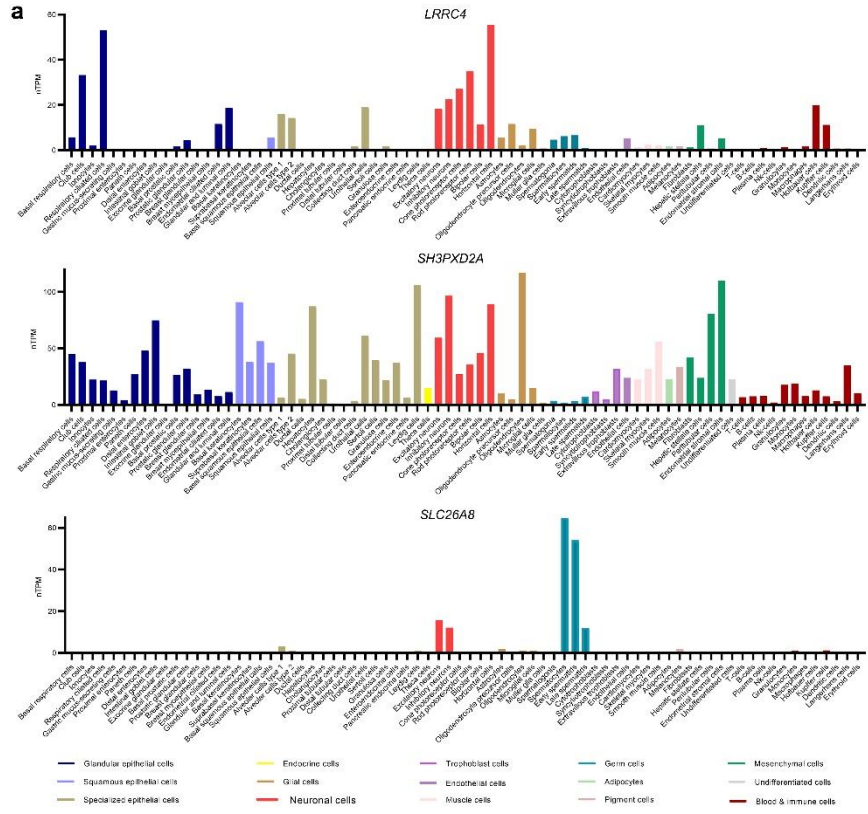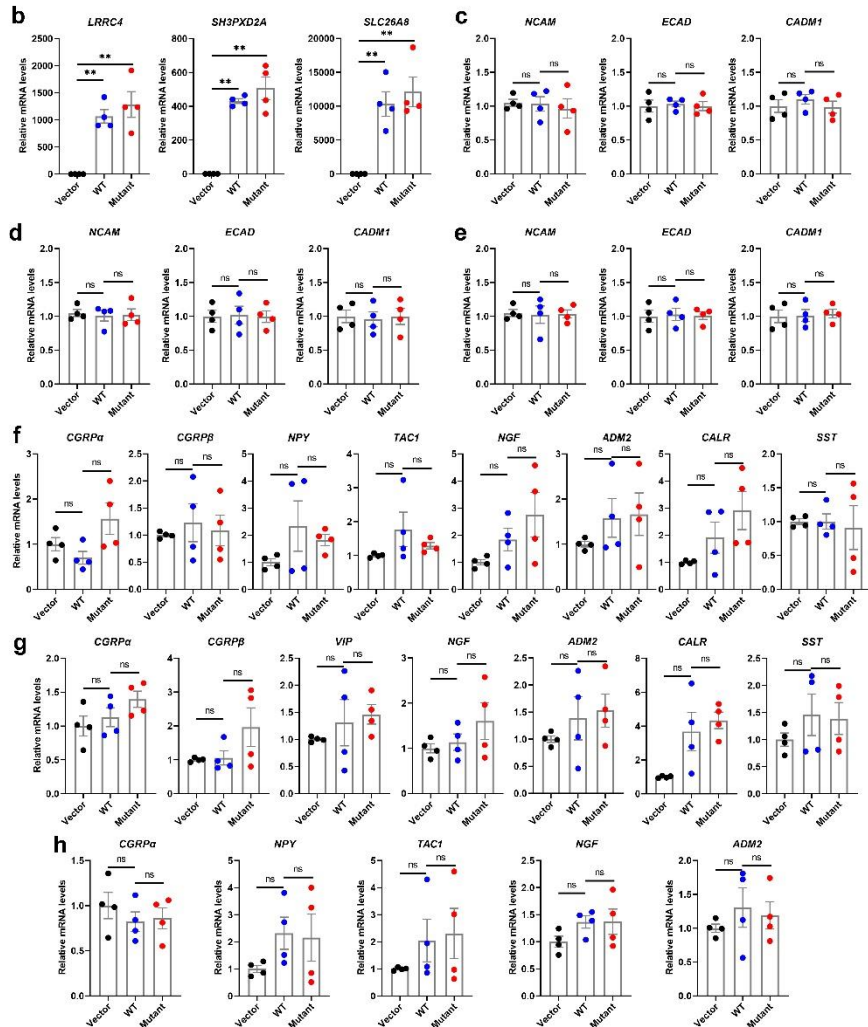

**Supplementary Figure 3. *LRRC4/SH3PXD2A/SLC26A8* Mutation upregulates vasoactive neuropeptides in human neural cells.** **a** The mRNA levels of *LRRC4/SH3PXD2A/SLC26A8* in different cell types of the whole human body analyzed by single cell RNA-sequencing data. Red pillars indicate neural cells. **b** The relative mRNA levels of *LRRC4/SH3PXD2A/SLC26A8* in human neural cells transfected respectively with *LRRC4*, *SH3PXD2A* and *SLC26A8* mutant/WT/control vector plasmids (n = 4 biologically independent experiments). *LRRC4*: Mutant vs Vector,  $P = 0.0007$ ; WT vs Vector,  $P = 0.0027$ , *SH3PXD2A*: Mutant vs Vector,  $P < 0.0001$ ; WT vs Vector,  $P < 0.0001$ , *SLC26A8*: Mutant vs Vector,  $P = 0.0016$ ; WT vs Vector,  $P = 0.0047$ . **c-e** The relative mRNA levels of *NCAM*, *ECAD* and *CADM1* in human neural cells transfected respectively with *LRRC4* (**c**), *SH3PXD2A* (**d**) and *SLC26A8* (**e**) mutant/WT/control vector plasmids (n = 4 biologically independent experiments). **f-h** The relative mRNA levels of *CGRP $\alpha$* , *CGRP $\beta$* , *VIP*, *NPY*, *TAC1*, *NGF*, *ADM2*, *CALR* and *SST* in human neural cells transfected respectively with *LRRC4* (**f**), *SH3PXD2A* (**g**) and *SLC26A8* (**h**) mutant/WT/control vector plasmids (n = 4 biologically independent experiments). Data represent the mean  $\pm$  SEM. \*\* $P < 0.01$ . ns indicates no significance. one-way ANOVA with Bonferroni's post hoc test was used.

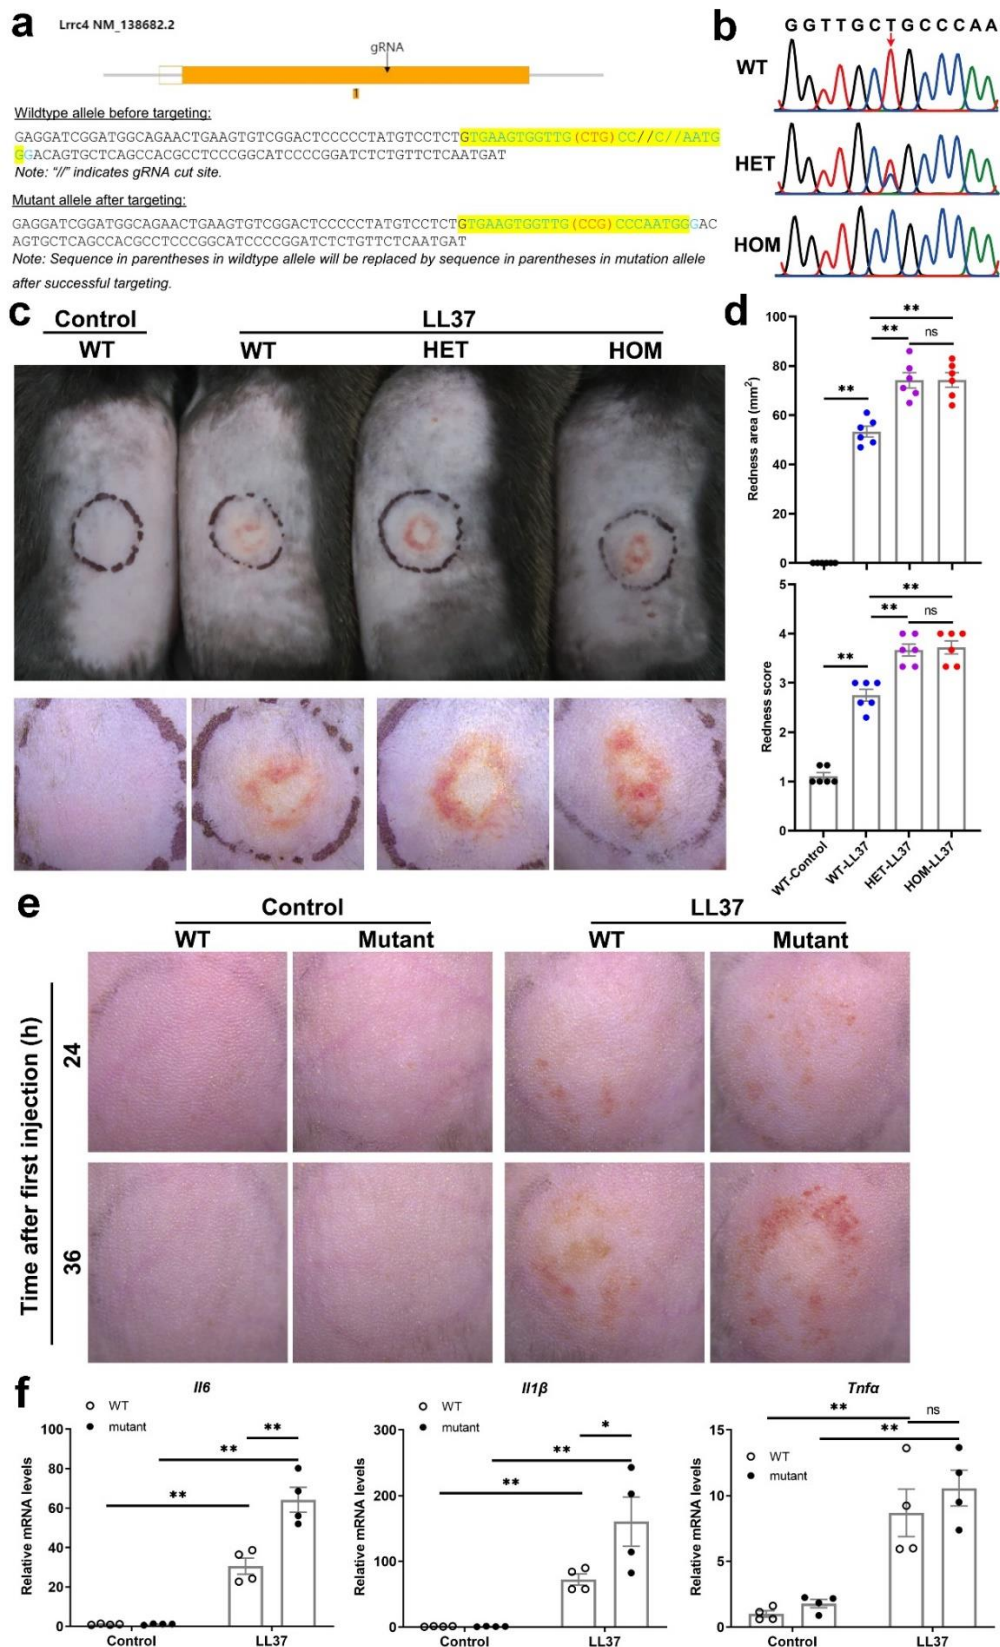

**Supplementary Figure 4. *Lrrc4* mutation aggravates rosacea development in mice.**

**a** Schematic illustration of knock-in strategy of *Lrrc4* mutation mice harboring L385P mutation. **b** The genotypes of WT, heterozygotes (HET) and homozygotes (HOM) mice

were validated by sanger DNA sequencing. **c** The back skins of WT, HET and HOM mice intradermally injected with LL37 or control vehicle. Images were taken 48 h after the first LL37 injection. Below panels, magnified images of black dotted circle areas. **d** The severity of the rosacea-like features after first LL37 injection for 48 h, was evaluated with the redness area and score (n = 6 for each group). Redness area: WT-LL37 vs WT-Control,  $P < 0.0001$ ; HET-LL37 vs WT-LL37,  $P < 0.0001$ ; HOM-LL37 vs WT-LL37,  $P < 0.0001$ ; HOM-LL37 vs HET-LL37,  $P > 0.9999$ . Redness score: WT-LL37 vs WT-Control,  $P < 0.0001$ ; HET-LL37 vs WT-LL37,  $P < 0.0001$ ; HOM-LL37 vs WT-LL37,  $P < 0.0001$ ; HOM-LL37 vs HET-LL37,  $P = 0.9997$ . **e** The back skins of WT and *Lrrc4* mutant mice intradermally injected with LL37 or control vehicle. Images were taken 24 h and 36h after the first LL37 injection. **f** The relative mRNA levels of *Il6*, *Il1 $\beta$*  and *Tnfa* in lesional skins from WT and *Lrrc4* mutant mice intradermally injected with LL37 or control vehicle (n = 4 for each group). *Il6*: Mutant (LL37) vs WT (LL37),  $P = 0.0002$ ; Mutant (LL37) vs Mutant (Control),  $P < 0.0001$ ; WT (LL37) vs WT (Control),  $P = 0.0007$ . *Il1 $\beta$* : Mutant (LL37) vs WT (LL37),  $P = 0.0307$ ; Mutant (LL37) vs Mutant (Control),  $P = 0.0004$ ; WT (LL37) vs WT (Control),  $P < 0.0001$ . *Tnfa*: Mutant (LL37) vs WT (LL37),  $P = 0.6655$ ; Mutant (LL37) vs Mutant (Control),  $P = 0.0008$ ; WT (LL37) vs WT (Control),  $P = 0.0023$ . All results are representative of at least 3 independent experiments. Data represent the mean  $\pm$  SEM. \* $P < 0.05$ , \*\* $P < 0.01$ . ns indicates no significance. one-way ANOVA with Bonferroni's post hoc test was used.

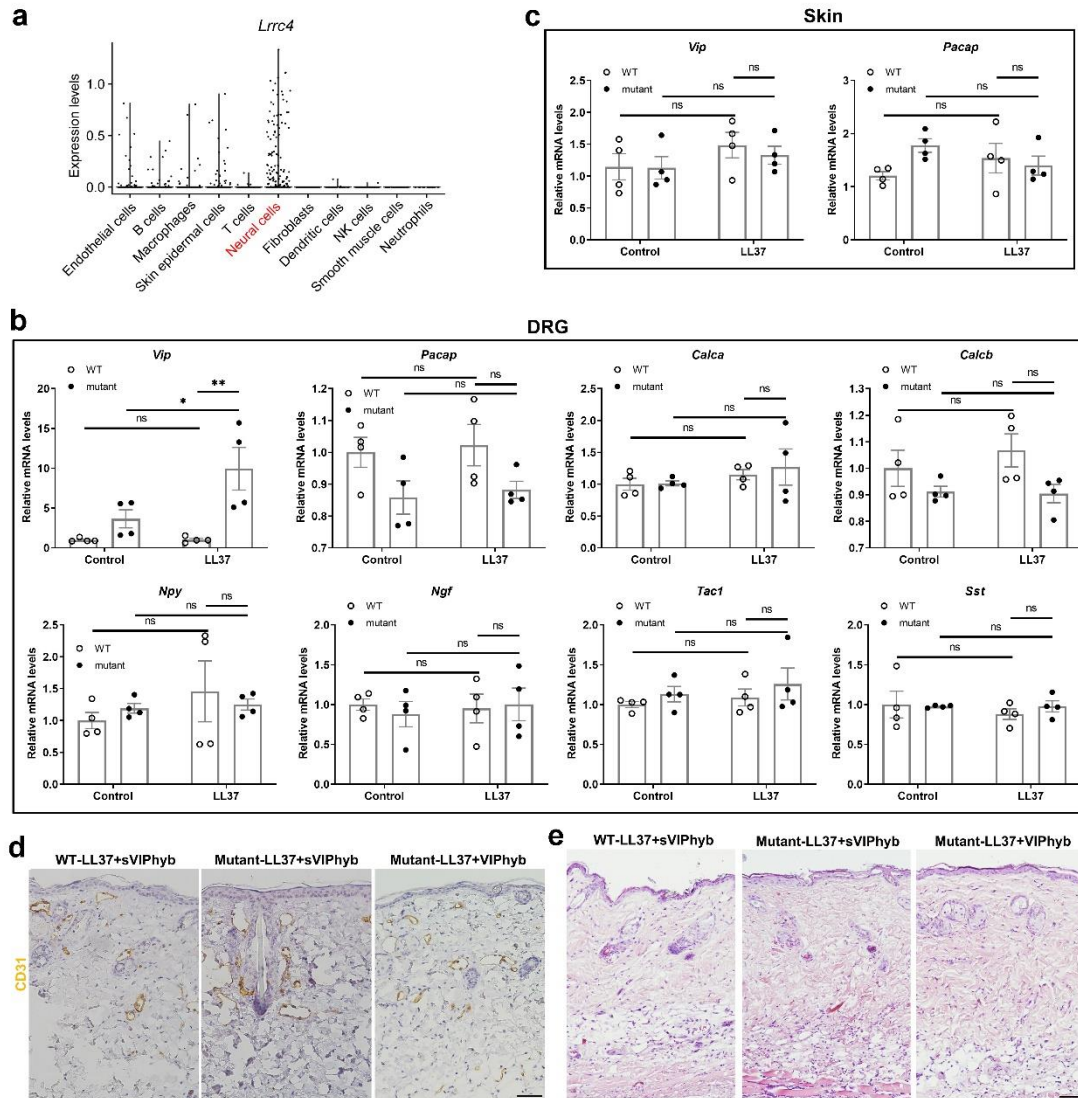

**Supplementary Figure 5. Inhibition of VIP signaling improves rosacea-like phenotypes in *Lrrc4* mutant mice.** **a** Violin plots showing the distribution of *Lrrc4* expression in the indicated cell types which may affect skin conditions from young mice (3 months). Skin epidermal cells (n = 636 cells), fibroblasts (n = 129 cells), endothelial cells (n = 3327 cells), neuronal cells (n = 410 cells), T cells (n = 714 cells), B cells (n = 3896 cells), Macrophages (n = 659 cells), NK cells (n = 337 cells), dendritic cells (n = 63 cells), neutrophils (n = 33 cells) and smooth muscle cells (n = 65 cells) were retrieved from Tabula Muris Senis (obtained from the Gene-Expression Omnibus, GSE149590). **b** The relative mRNA levels of *Vip*, *Pacap*, *Calca*, *Calcb*, *Npy*, *Ngf*, *Tac1*, *Sst* and *Calr* in dorsal root ganglions (DRGs) from WT and mutant mice treated with LL37 or control vehicle (n = 4 mice for each group). *Vip*: Mutant (LL37) vs WT (LL37),  $P = 0.0047$ ; Mutant (LL37) vs Mutant (Control),  $P = 0.043$ ; WT (LL37) vs WT (Control),  $P > 0.9999$ . *Pacap*: Mutant (LL37)

vs WT (LL37),  $P = 0.2404$ ; Mutant (LL37) vs Mutant (Control),  $P = 0.9858$ ; WT (LL37) vs WT (Control),  $P = 0.9876$ . *Calca*: Mutant (LL37) vs WT (LL37),  $P = 0.9478$ ; Mutant (LL37) vs Mutant (Control),  $P = 0.6604$ ; WT (LL37) vs WT (Control),  $P = 0.9008$ . *Calcb*: Mutant (LL37) vs WT (LL37),  $P = 0.1536$ ; Mutant (LL37) vs Mutant (Control),  $P = 0.9995$ ; WT (LL37) vs WT (Control),  $P = 0.7801$ . *Npy*: Mutant (LL37) vs WT (LL37),  $P = 0.9372$ ; Mutant (LL37) vs Mutant (Control),  $P = 0.9984$ ; WT (LL37) vs WT (Control),  $P = 0.5944$ . *Ngf*: Mutant (LL37) vs WT (LL37),  $P = 0.9959$ ; Mutant (LL37) vs Mutant (Control),  $P = 0.9483$ ; WT (LL37) vs WT (Control),  $P = 0.9965$ . *Tac1*: Mutant (LL37) vs WT (LL37),  $P = 0.7729$ ; Mutant (LL37) vs Mutant (Control),  $P = 0.8855$ ; WT (LL37) vs WT (Control),  $P = 0.9568$ . *Sst*: Mutant (LL37) vs WT (LL37),  $P = 0.8917$ ; Mutant (LL37) vs Mutant (Control),  $P > 0.9999$ ; WT (LL37) vs WT (Control),  $P = 0.8213$ . **c** The relative mRNA levels of *Vip*, *Pacap* in skin lesions from WT and mutant mice treated with LL37 or control vehicle ( $n = 4$  mice for each group). **d** IHC of CD31 on skin sections from LL37-treated WT and *Lrrc4* mutant mice intradermally injected with VIPhyb or sVIPhyb. Scale bar, 50  $\mu\text{m}$ . **e** HE staining of lesional skin sections from LL37-treated WT and *Lrrc4* mutant mice intradermally injected with VIPhyb or sVIPhyb. Scale bar, 50  $\mu\text{m}$ . All results are representative of at least 3 independent experiments. Data represent the mean  $\pm$  SEM. \* $P < 0.05$ , \*\* $P < 0.01$ . ns indicates no significance. one-way ANOVA with Bonferroni's post hoc test was used.

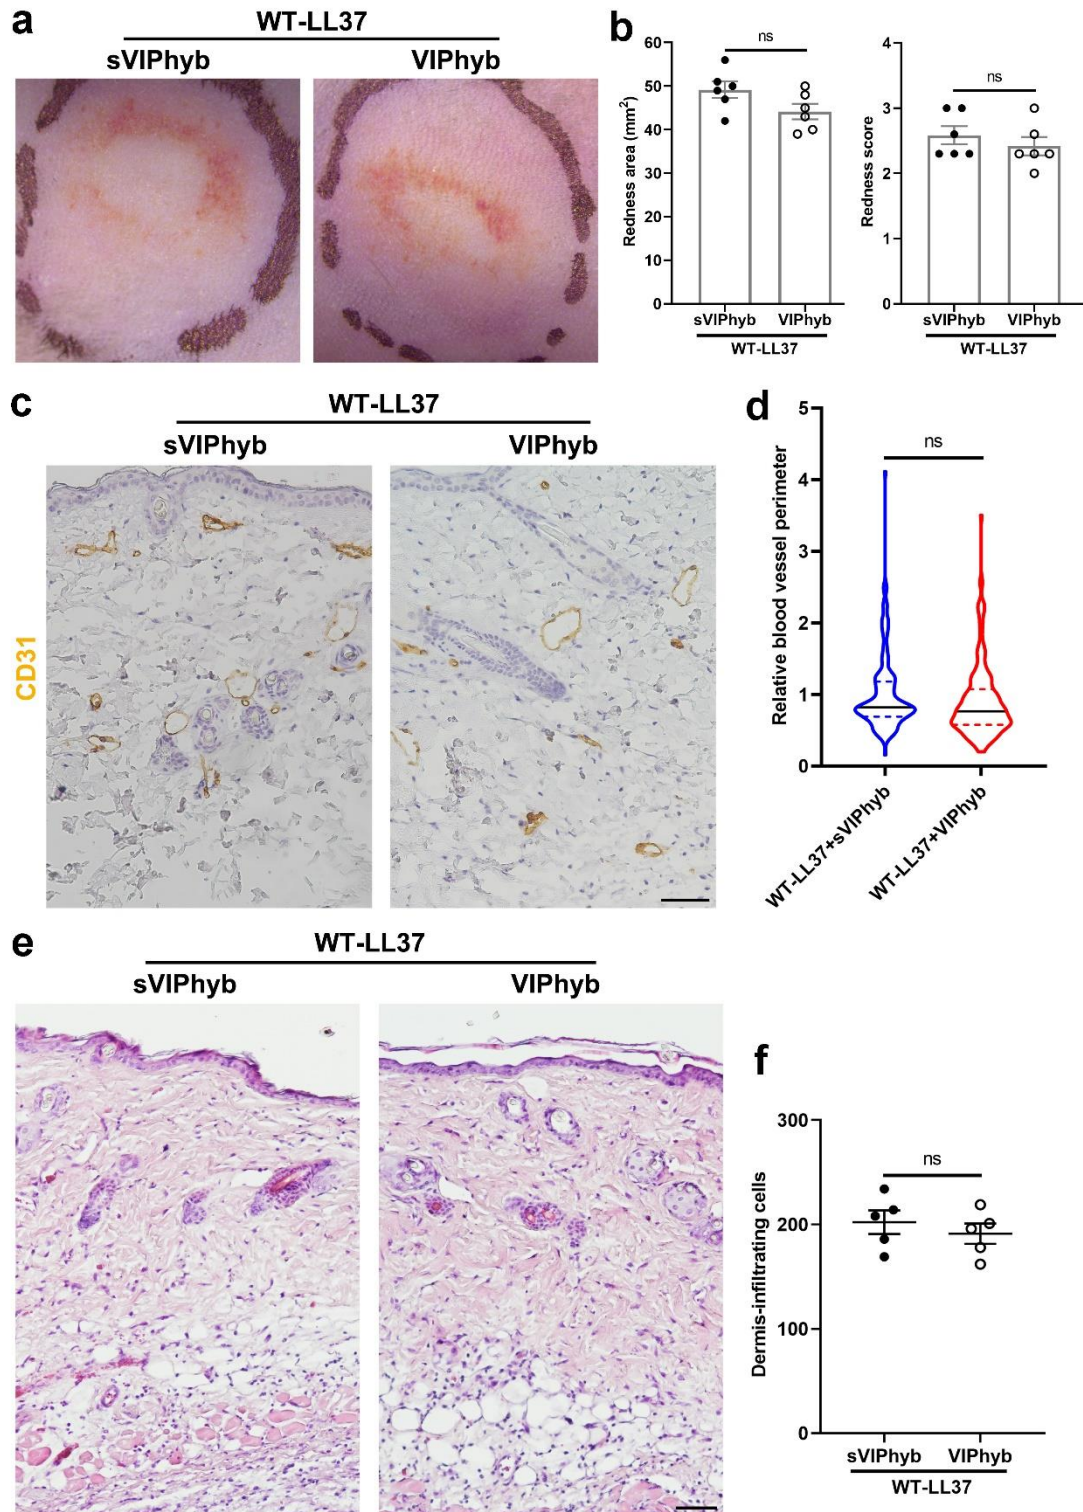

**Supplementary Figure 6. VIPhyb injections do not affect the rosacea-like phenotypes induced by LL37 in WT mice.** **a** The back skins of LL37-injected WT mice treated with VIPhyb or sVIPhyb. Images were taken 48 h after the first LL37 injection. **b** The severity of the rosacea-like features after first LL37 injection for 48 h, was evaluated with the redness area and score (n = 6 for each group). **c** IHC of CD31 on skin sections

from LL37-treated WT mice intradermally injected with VIPhyb or sVIPhyb. Scale bar, 50  $\mu$ m. **d** Quantification of relative blood vessel perimeter in the corresponding groups presented with violin plot.  $n = 179$ – $182$  blood vessels from 5 independent mice for each group.  $P = 0.0701$ . **e** HE staining of lesional skin sections from LL37-treated WT mice intradermally injected with VIPhyb or sVIPhyb. Scale bar, 50  $\mu$ m. **f** Dermal infiltrating cells were quantified ( $n = 5$  for each group).  $P = 0.4828$ . All results are representative of at least 3 independent experiments. Data represent the mean  $\pm$  SEM. ns indicates no significance. Two-tailed unpaired Student's  $t$ -test was used.
